# Supplementary material for: Metallo-gels and organo-gels with tripodal cyclotriveratrylene-type and 1,3,5-substituted benzene-type ligands
Source: Royal Society of Chemistry journal article supplement (doi:10.1039/b819352e), 2009-01-01
Supplement: b819352e.pdf [file b819352e.pdf]

## Metallo-gels and organo-gels with tripodal ligands

Aleema Westcott, Christopher J. Sumby, Richard Walshaw and Michaele J. Hardie

### Supplementary information

NMR spectra of

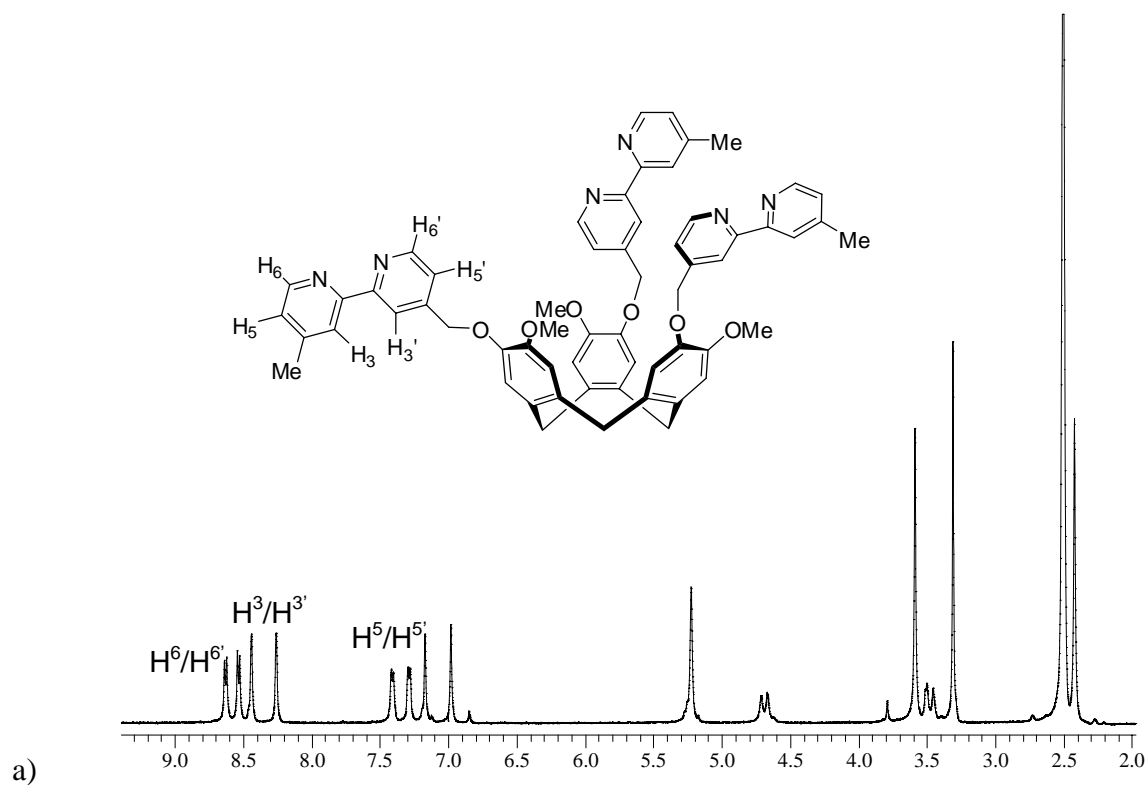

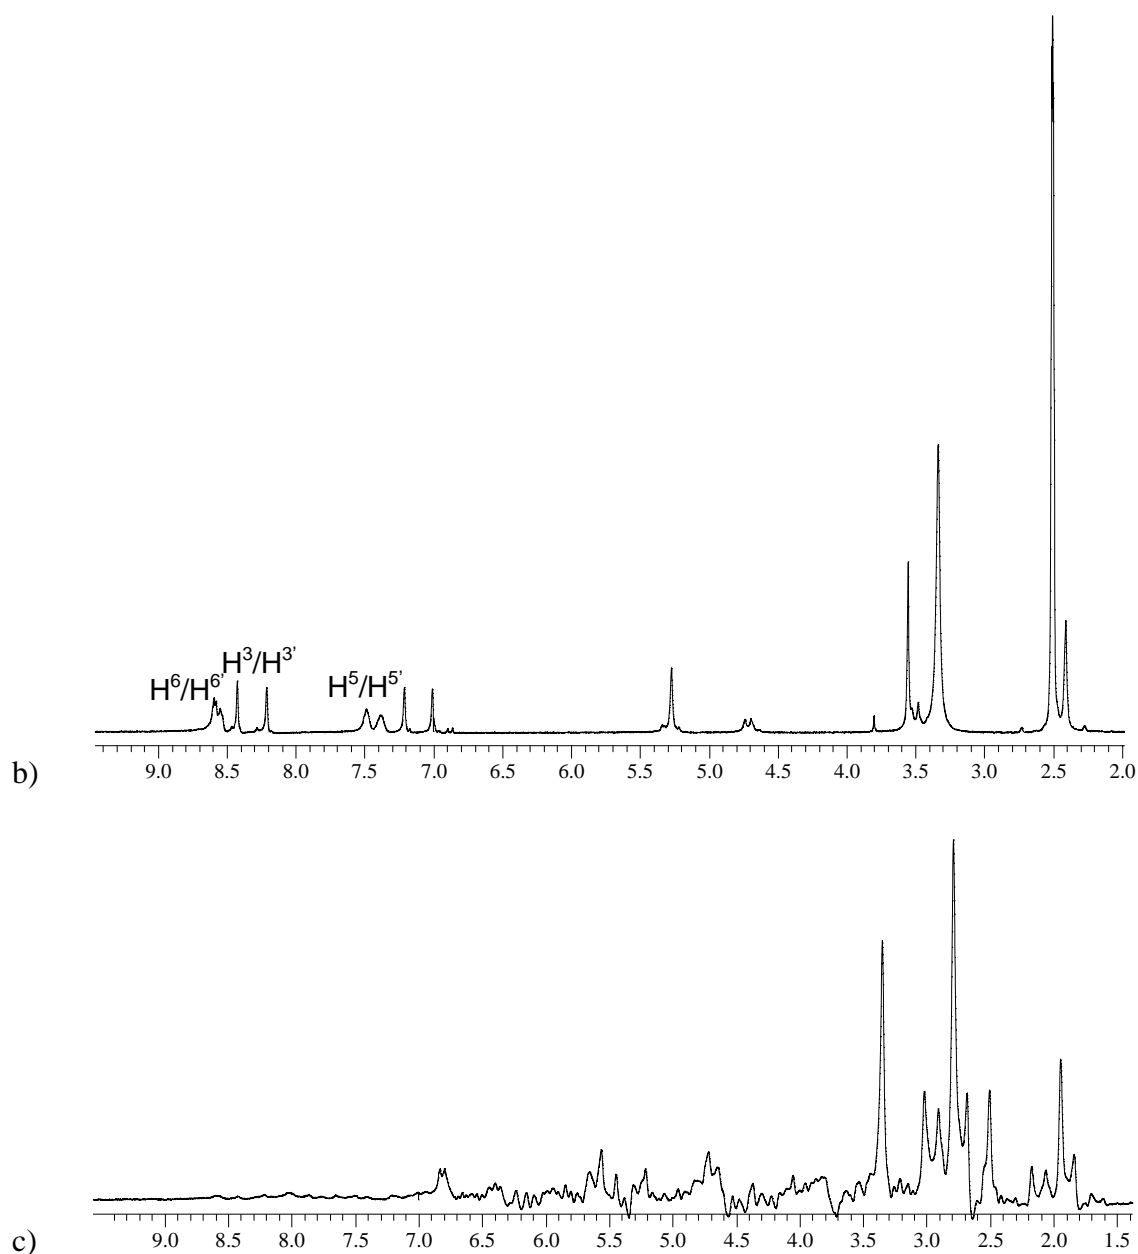

Figure S1–  $^1\text{H}$  NMR spectrum in DMSO of; a) ligand **1** (11.5 mM), b) ligand **1** (11.5 mM) and  $\text{AgSbF}_6$  1:3 stoichiometry at 0 hours and c) ligand **1** (11.5 mM) and  $\text{AgSbF}_6$  1:3 stoichiometry after 3 hours at which time solution had become very viscous.

Table S2 – The assignments and chemical induced shifts for ligand **1** with  $\text{AgSbF}_6$ .

| <b>Compound</b>   | <b>Ligand 2.8</b> | <b>+ <math>\text{AgSbF}_6</math></b> | <b>CIS</b> |
|-------------------|-------------------|--------------------------------------|------------|
| Me(s)             | 3.309             | 3.349                                | +0.04      |
| $\text{CH}_2$ (d) | 5.224             | 5.279                                | +0.055     |

|                       |              |              |                |
|-----------------------|--------------|--------------|----------------|
| CH <sub>2</sub> O(s)  | 3.475, 4.689 | 3.47, 4.718  | -0.005, +0.029 |
| OMe(s)                | 3.587        | 3.554        | -0.033         |
| aryl H(s)             | 6.981, 7.170 | 7.010, 7.213 | +0.029, +0.043 |
| H <sup>5/5'</sup> (d) | 7.285, 7.417 | 7.391, 7.5   | +0.106, +0.083 |
| H <sup>3/3'</sup> (s) | 8.259, 8.440 | 8.201, 8.422 | -0.058, +0.002 |
| H <sup>6/6'</sup> (d) | 8.534, 8.629 | 8.539, 8.584 | +0.006, -0.045 |

---

CIS = Chemical Induced Shift

| <b>Solvent/ligand</b> | <b>3</b>                | <b>4</b>                | <b>4a</b> | <b>5</b> | <b>2</b>                 | <b>1</b>                 | <b>6</b>                 |
|-----------------------|-------------------------|-------------------------|-----------|----------|--------------------------|--------------------------|--------------------------|
| Dichloromethane       | i                       | s                       | s         | s        | s                        | s                        | <b>Metallo-gel<br/>F</b> |
| Water                 | i                       | i                       | i         | i        | i                        | i                        | i                        |
| Methanol              | i                       | s                       | s         | s        | i                        | i                        | i                        |
| Ethanol               | i                       | s                       | s         | s        | i                        | i                        | i                        |
| Acetonitrile          | i                       | s                       | s         | s        | <b>Metallo-gel<br/>C</b> | s                        | i                        |
| Hexane                | i                       | i                       | i         | i        | i                        | i                        | i                        |
| DMSO                  | s                       | s                       | s         | s        | s                        | <b>Metallo-gel<br/>B</b> | s                        |
| DMF                   | s                       | s                       | s         | s        | s                        | <b>Metallo-gel<br/>A</b> | s                        |
| Trifluoroethanol      | <b>Organo-gel<br/>D</b> | s                       | s         | s        | s                        | s                        | s                        |
| Nitromethane          | i                       | i                       | i         | i        | i                        | i                        | <b>Metallo-gel<br/>G</b> |
| Ethyl acetate         | i                       | i                       | i         | i        | i                        | i                        | s                        |
| Acetone               | i                       | <b>Organo-gel<br/>E</b> | s         | s        | s                        | i                        | i                        |
| Toluene               | i                       | i                       | i         | i        | i                        | i                        | s                        |

The dropping ball method involves placing a steel ball bearing on top of 1 mL of gel. The gel was then heated in an oil bath heated at 0.5 °C per min, and the  $T_{gel}$  value was taken at the point the gel could not support the weight of the ball bearing any longer. The 'tilting tube method' involved heating an inverted glass vial containing 1mL of gel in an oil bath (0.5 °C per min). The  $T_{gel}$  value was taken at the point the gel melted to produce a sol.
